# Supplementary material for: A picorna-like virus suppresses the N-end rule pathway to inhibit apoptosis
Source: eLife journal article supplement (doi:10.7554/elife.30590), 2017-12-12
Supplement: supp [file for Figure 1B.xls]

## Sheet: Sheet1
	#1 APC+/PI-	#1 APC+/PI+	#1 APC+	#2 APC+/PI-	#2 APC+/PI+	#2 APC+	#3 APC+/PI-	#3 APC+/PI+	#3 APC+	Average APC+/PI-	Average APC+/PI+	Average APC+	SD APC+
mi	0.0197667	0.0263	0.0460667	0.0135333	0.0285	0.0420333	0.0191333	0.0328	0.0519333	0.0174778	0.0292	0.0466778	0.00497821
DCV(12h.p.i)	0.0340333	0.0328667	0.0669	0.0339667	0.0415	0.0754667	0.0348667	0.0440667	0.0789333	0.0342889	0.0394778	0.0737667	0.00619417
DCV(18h.p.i)	0.105967	0.164433	0.2704	0.0767333	0.1314	0.208133	0.0544	0.189833	0.244233	0.0790333	0.161889	0.240922	0.0312651
DCV(24h.p.i)	0.0328333	0.5128	0.545633	0.0375667	0.381233	0.4188	0.0265	0.536333	0.562833	0.0323	0.476789	0.509089	0.078664
