# Supplementary material for: A picorna-like virus suppresses the N-end rule pathway to inhibit apoptosis
Source: eLife journal article supplement (doi:10.7554/elife.30590), 2017-12-12
Supplement: supp [file for Figure 1D.xls]

## Sheet: Sheet1
Hid/rp49	#1	#2	#3	Average	SD
mi	1	1	1	1	0
DCV(3h.p.i.)	1.106	1.148	0.982	1.07867	0.0863095
DCV(6h.p.i.)	1.544	1	1.101	1.215	0.289363
DCV(12h.p.i.)	2.78	1.919	2.27	2.323	0.43294
DCV(18h.p.i.)	2.34	2.426	2.735	2.50033	0.207727
DCV(24h.p.i.)	2.33	2.742	2.134	2.402	0.310329
Rpr/rp49	#1	#2	#3	Average	SD
mi	1	1	1	1	0
DCV(3h.p.i.)	1.034	1.099	1.43	1.18767	0.212368
DCV(6h.p.i.)	2.218	2.178	3.51	2.63533	0.757748
DCV(12h.p.i.)	8.437	7.862	12.39	9.563	2.46508
DCV(18h.p.i.)	16.314	13.66	17.21	15.728	1.84612
DCV(24h.p.i.)	21.42	20.663	31.06	24.381	5.79655
Grim/rp49	#1	#2	#3	Average	SD
mi	1	1	1	1	0
DCV(3h.p.i.)	1.37	1.36	1.2	1.31	0.0953939
DCV(6h.p.i.)	1.3	1.2	1.17	1.22333	0.0680686
DCV(12h.p.i.)	1.79	1.69	1.18	1.55333	0.327159
DCV(18h.p.i.)	5.64	8.64	9.74	8.00667	2.12211
DCV(24h.p.i.)	15.42	25.28	21.03	20.5767	4.94561
