# Supplementary material for: A picorna-like virus suppresses the N-end rule pathway to inhibit apoptosis
Source: eLife journal article supplement (doi:10.7554/elife.30590), 2017-12-12
Supplement: supp [file for Figure 2A.xls]

## Sheet: Sheet1
	#1 APC+/PI-	#1 APC+/PI+	#1 APC+	#2 APC+/PI-	#2 APC+/PI+	#2 APC+	#3 APC+/PI-	#3 APC+/PI+	#3 APC+	Average APC+/PI-	Average APC+/PI+	Average APC+	SD APC+
vector	0.1021	0.73	0.8321	0.1188	0.5596	0.6784	0.1187	0.5699	0.6886	0.1132	0.619833	0.733033	0.0859457
DIAP1	0.2827	0.0938	0.3765	0.2169	0.0771	0.294	0.2306	0.0813	0.3119	0.2434	0.0840667	0.327467	0.043397
