# Supplementary material for: A picorna-like virus suppresses the N-end rule pathway to inhibit apoptosis
Source: eLife journal article supplement (doi:10.7554/elife.30590), 2017-12-12
Supplement: supp [file for Figure 2B.xls]

## Sheet: Sheet1
DCV/rp49	#1	#2	#3	Average	SD
vector	1	1	1	1	0
DIAP1	1.76164	1.84154	2.70698	2.10339	0.52425
