# Supplementary material for: A picorna-like virus suppresses the N-end rule pathway to inhibit apoptosis
Source: eLife journal article supplement (doi:10.7554/elife.30590), 2017-12-12
Supplement: supp [file for Figure 2C.xls]

## Sheet: Sheet1
DCV	#1	#2	#3	Average	SD
vector	1	1	1	1	0
DIAP1	3.14045	3.00264	2.31659	2.8199	0.441287
