# Supplementary material for: A picorna-like virus suppresses the N-end rule pathway to inhibit apoptosis
Source: eLife journal article supplement (doi:10.7554/elife.30590), 2017-12-12
Supplement: supp [file for Figure 2D.xls]

## Sheet: Sheet1
	#1 APC+/PI-	#1 APC+/PI+	#1 APC+	#2 APC+/PI-	#2 APC+/PI+	#2 APC+	#3 APC+/PI-	#3 APC+/PI+	#3 APC+	Average APC+/PI-	Average APC+/PI+	Average APC+	SD APC+
GFP	0.1133	0.6742	0.7875	0.1149	0.68	0.7949	0.0965	0.7641	0.8606	0.108233	0.7061	0.814333	0.0402386
DCP1+DrICE	0.271	0.1075	0.3785	0.2872	0.106	0.3932	0.2856	0.111	0.3966	0.281267	0.108167	0.389433	0.00961994
