# Supplementary material for: A picorna-like virus suppresses the N-end rule pathway to inhibit apoptosis
Source: eLife journal article supplement (doi:10.7554/elife.30590), 2017-12-12
Supplement: supp [file for Figure 2E.xls]

## Sheet: Sheet1
DCV/rp49	#1	#2	#3	Average	SD
GFP	1	1	1	1	0
DCP1+DrICE	2.59991	1.53003	2.59276	2.2409	0.615642
