# Supplementary material for: A picorna-like virus suppresses the N-end rule pathway to inhibit apoptosis
Source: eLife journal article supplement (doi:10.7554/elife.30590), 2017-12-12
Supplement: supp [file for Figure 2G.xls]

## Sheet: Sheet1
w1118	#1	#2	#3	Survival	SD		p53-/-	#1	#2	#3	Survival	SD
1 h.p.i.	30	30	30	1	0		1 h.p.i.	30	30	30	1	0
2 h.p.i.	30	30	30	1	0		2 h.p.i.	30	30	30	1	0
3 h.p.i.	30	30	30	1	0		3 h.p.i.	30	30	30	1	0
4 h.p.i.	30	30	30	1	0		4 h.p.i.	30	30	30	1	0
5 h.p.i.	29	30	30	0.988889	0.019245		5 h.p.i.	30	29	30	0.988889	0.019245
6 h.p.i.	28	30	30	0.977778	0.03849		6 h.p.i.	29	28	30	0.966667	0.0333333
7 h.p.i.	28	30	29	0.966667	0.0333333		7 h.p.i.	29	28	29	0.955556	0.019245
8 h.p.i.	28	30	29	0.966667	0.0333333		8 h.p.i.	29	28	29	0.955556	0.019245
9 h.p.i.	27	29	29	0.944444	0.03849		9 h.p.i.	29	28	29	0.955556	0.019245
10 h.p.i.	27	29	29	0.944444	0.03849		10 h.p.i.	29	28	29	0.955556	0.019245
11 h.p.i.	27	29	29	0.944444	0.03849		11 h.p.i.	29	27	29	0.944444	0.03849
12 h.p.i.	27	29	27	0.922222	0.03849		12 h.p.i.	29	27	28	0.933333	0.0333333
13 h.p.i.	27	29	27	0.922222	0.03849		13 h.p.i.	29	27	28	0.933333	0.0333333
14 h.p.i.	27	28	27	0.911111	0.019245		14 h.p.i.	29	27	28	0.933333	0.0333333
w1118+DCV	#1	#2	#3	Survival	SD		p53-/-+DCV	#1	#2	#3	Survival	SD
1 h.p.i.	30	30	30	1	0		1 h.p.i.	30	30	30	1	0
2 h.p.i.	30	30	30	1	0		2 h.p.i.	30	30	30	1	0
3 h.p.i.	29	30	28	0.966667	0.0333333		3 h.p.i.	27	28	27	0.911111	0.019245
4 h.p.i.	25	28	24	0.855556	0.0693889		4 h.p.i.	22	25	21	0.755556	0.0693889
5 h.p.i.	22	24	20	0.733333	0.0666667		5 h.p.i.	17	20	15	0.577778	0.083887
6 h.p.i.	18	18	13	0.544444	0.096225		6 h.p.i.	8	12	11	0.344444	0.0693889
7 h.p.i.	12	15	11	0.422222	0.0693889		7 h.p.i.	1	2	0	0.0333333	0.0333333
8 h.p.i.	11	15	9	0.388889	0.101835		8 h.p.i.	1	2	0	0.0333333	0.0333333
9 h.p.i.	11	14	8	0.366667	0.1		9 h.p.i.	1	2	0	0.0333333	0.0333333
10 h.p.i.	11	14	8	0.366667	0.1		10 h.p.i.	1	0	0	0.0111111	0.019245
11 h.p.i.	11	14	8	0.366667	0.1		11 h.p.i.	1	0	0	0.0111111	0.019245
12 h.p.i.	11	12	8	0.344444	0.0693889		12 h.p.i.	1	0	0	0.0111111	0.019245
13 h.p.i.	11	12	8	0.344444	0.0693889		13 h.p.i.	1	0	0	0.0111111	0.019245
14 h.p.i.	11	12	8	0.344444	0.0693889		14 h.p.i.	1	0	0	0.0111111	0.019245
