# Supplementary material for: A picorna-like virus suppresses the N-end rule pathway to inhibit apoptosis
Source: eLife journal article supplement (doi:10.7554/elife.30590), 2017-12-12
Supplement: supp [file for Figure 3-figure supplement 1D.xls]

## Sheet: Sheet1
1B	#1	#2	#3	Average	SD
lane 1	1	1	1	1	0
lane 2	0.9263	1.1583	0.9336	1.00607	0.131888
lane 3	1.2901	1.0552	0.8294	1.05823	0.230365
lane 4	0.2228	0.7939	0.7036	0.573433	0.306996
lane 5	0.1484	0.5149	0.3379	0.333733	0.183286
lane 6	0.1637	0.2678	0.1799	0.2038	0.0560144
1C	#1	#2	#3	Average	SD
lane 1	1	1	1	1	0
lane 2	0.8879	0.6407	0.4493	0.6593	0.219891
lane 3	0.3046	0.2445	0.2082	0.252433	0.0486872
lane 4	0.2106	0.1081	0.0081	0.108933	0.101253
lane 5	0.1308	0.0246	0.0253	0.0602333	0.0611135
lane 6	0.0086	0	0	0.00286667	0.00496521
