# Supplementary material for: A picorna-like virus suppresses the N-end rule pathway to inhibit apoptosis
Source: eLife journal article supplement (doi:10.7554/elife.30590), 2017-12-12
Supplement: supp [file for Figure 3-figure supplement 2.xls]

## Sheet: Sheet1
DIAP1/rp49	#1	#2	#3	Average	SD
lane 1	1	1	1	1	0
lane 2	1.02033	0.960422	1.19437	1.05837	0.121524
lane 3	1.31956	0.888558	1.05905	1.08905	0.21706
lane 4	0.998884	1.05448	0.66306	0.905474	0.211769
lane 5	0.89844	0.76822	0.749021	0.805227	0.0812939
lane 6	1.11348	0.786914	0.848005	0.916133	0.173615
