# Supplementary material for: A picorna-like virus suppresses the N-end rule pathway to inhibit apoptosis
Source: eLife journal article supplement (doi:10.7554/elife.30590), 2017-12-12
Supplement: supp [file for Figure 3I.xls]

## Sheet: Sheet1
	#1	#2	#3	Average	SD
vector+mi	1	1	1	1	0
DIAP1+mi	0.82653	1.14891	0.747709	0.907717	0.212567
DIAP1delN20+mi	1.38814	0.707081	0.504019	0.866413	0.463095
vector+DCV(9h.p.i.)	2.83507	2.38066	1.41402	2.20992	0.725747
DIAP1+DCV(9h.p.i.)	1.57666	1.66064	1.57018	1.60249	0.050458
DIAP1delN20+DCV(9h.p.i.)	2.47205	0.93243	1.06899	1.49116	0.852216
vector+DCV(12h.p.i.)	3.94972	2.83825	3.35372	3.38057	0.556224
DIAP1+DCV(12h.p.i.)	2.40662	1.84181	1.5457	1.93138	0.437395
DIAP1delN20+DCV(12h.p.i.)	1.95598	1.27157	1.4236	1.55038	0.359391
