# Supplementary material for: A picorna-like virus suppresses the N-end rule pathway to inhibit apoptosis
Source: eLife journal article supplement (doi:10.7554/elife.30590), 2017-12-12
Supplement: supp [file for Figure 5B.xls]

## Sheet: Sheet1
NTAN1/rp49	#1	#2	#3	Average	SD
mi	1	1	1	1	0
DCV(1h.p.i.)	1.23	1.53	0.828	1.196	0.352233
DCV(2h.p.i.)	0.987	1.333	1.308	1.20933	0.192952
DCV(4h.p.i.)	2.223	1.56	1.892	1.89167	0.3315
DCV(6h.p.i.)	3.225	2.033	2.01	2.42267	0.694936
DCV(8h.p.i.)	2.533	1.824	2.878	2.41167	0.537374
ATE1/rp49	#1	#2	#3	Average	SD
mi	1	1	1	1	0
DCV(1h.p.i.)	0.998	1.276	0.578	0.950667	0.351399
DCV(2h.p.i.)	1.534	1.438	0.872	1.28133	0.357728
DCV(4h.p.i.)	1.553	1.264	0.809	1.20867	0.375074
DCV(6h.p.i.)	2.333	1.537	1.847	1.90567	0.40123
DCV(8h.p.i.)	2.77	1.498	1.957	2.075	0.644158
