# Supplementary material for: A picorna-like virus suppresses the N-end rule pathway to inhibit apoptosis
Source: eLife journal article supplement (doi:10.7554/elife.30590), 2017-12-12
Supplement: supp [file for Figure 5H.xls]

## Sheet: Sheet1
5F	#1	#2	#3	Average	SD
lane 1	1	1	1	1	0
lane 2	0.8502	1.0441	1.0238	0.9727	0.106573
lane 3	0.7523	0.9714	0.9586	0.8941	0.122969
lane 4	0.5891	0.983	0.9118	0.827967	0.209906
lane 5	0.3441	0.9296	0.6697	0.6478	0.293364
lane 6	0.153	0.6404	0.2409	0.344767	0.259771
5G	#1	#2	#3	Average	SD
lane 1	1	1	1	1	0
lane 2	0.447	0.998	0.5889	0.677967	0.286094
lane 3	0.0357	0.3225	0.0894	0.1492	0.152465
lane 4	0.0217	0.0144	0.011	0.0157	0.00546717
lane 5	0.0087	0	0	0.0029	0.00502295
lane 6	0.0061	0	0	0.00203333	0.00352184
