# Supplementary material for: A picorna-like virus suppresses the N-end rule pathway to inhibit apoptosis
Source: eLife journal article supplement (doi:10.7554/elife.30590), 2017-12-12
Supplement: supp [file for Figure 6H.xls]

## Sheet: Sheet1
6D	#1	#2	#3	Average	SD
lane 1	1	1	1	1	0
lane 2	0.6312	0.7597	1.0302	0.807033	0.203668
lane 3	0.5166	0.4491	0.938	0.634567	0.264939
lane 4	0.5178	0.3562	0.861	0.578333	0.257787
lane 5	0.4835	0.303	0.6257	0.470733	0.161728
lane 6	0.121	0.1102	0.1874	0.139533	0.041804
6E	#1	#2	#3	Average	SD
lane 1	1	1	1	1	0
lane 2	0.4099	0.3234	0.589	0.440767	0.135464
lane 3	0.1578	0.1754	0.3461	0.226433	0.104007
lane 4	0.0777	0	0.1532	0.0769667	0.0766026
lane 5	0.0024	0	0.2026	0.0683333	0.116285
lane 6	0.007	0	0.0075	0.00483333	0.00419325
6F	#1	#2	#3	Average	SD
lane 1	1	1	1	1	0
lane 2	1.1035	0.9635	0.8421	0.9697	0.13081
lane 3	1.0625	0.6805	0.7676	0.836867	0.200198
lane 4	1.0318	0.6204	0.6522	0.768133	0.228895
lane 5	0.6734	0.6562	0.5849	0.638167	0.0469251
lane 6	0.9759	0.63	0.3572	0.654367	0.310069
6G	#1	#2	#3	Average	SD
lane 1	1	1	1	1	0
lane 2	0.7727	0.4991	0.6342	0.635333	0.136804
lane 3	0.3446	0.0568	0.3683	0.256567	0.173408
lane 4	0.1148	0.0213	0.0816	0.0725667	0.0474
lane 5	0.0526	0.0052	0	0.0192667	0.0289844
lane 6	0.0211	0.0125	0.0045	0.0127	0.00830181
