# Supplementary material for: A picorna-like virus suppresses the N-end rule pathway to inhibit apoptosis
Source: eLife journal article supplement (doi:10.7554/elife.30590), 2017-12-12
Supplement: supp [file for Figure 7-figure supplement 1A.xls]

## Sheet: Sheet1
	#1 APC+/PI-	#1 APC+/PI+	#1 APC+	#2 APC+/PI-	#2 APC+/PI+	#2 APC+	#3 APC+/PI-	#3 APC+/PI+	#3 APC+	Average APC+/PI-	Average APC+/PI+	Average APC+	SD APC+
GFP	0.0572	0.1756	0.2328	0.0555	0.1744	0.2299	0.0574	0.1764	0.2338	0.0567	0.175467	0.232167	0.00202567
NTAN1	0.055	0.0882	0.1432	0.0551	0.0966	0.1517	0.0605	0.0896	0.1501	0.0568667	0.0914667	0.148333	0.004517
