# Supplementary material for: A picorna-like virus suppresses the N-end rule pathway to inhibit apoptosis
Source: eLife journal article supplement (doi:10.7554/elife.30590), 2017-12-12
Supplement: supp [file for Figure 7-figure supplement 1B.xls]

## Sheet: Sheet1
DCV/rp49	#1	#2	#3	Average	SD
GFP	1	1	1	1	0
NTAN1	1.13918	2.39496	2.60268	2.04561	0.791828
