# Supplementary material for: A picorna-like virus suppresses the N-end rule pathway to inhibit apoptosis
Source: eLife journal article supplement (doi:10.7554/elife.30590), 2017-12-12
Supplement: supp [file for Figure 7B.xls]

## Sheet: Sheet1
	#1 APC+/PI-	#1 APC+/PI+	#1 APC+	#2 APC+/PI-	#2 APC+/PI+	#2 APC+	#3 APC+/PI-	#3 APC+/PI+	#3 APC+	#4 APC+/PI-	#4 APC+/PI+	#4 APC+	#5 APC+/PI-	#5 APC+/PI+	#5 APC+	#6 APC+/PI-	#6 APC+/PI+	#6 APC+	average APC+/PI-	average APC+/PI+	average APC+	SD APC+
mi	0.0164	0.0151	0.0315	0.0143	0.0162	0.0305	0.0163	0.0148	0.0311	0.0162	0.0243	0.0405	0.0181	0.0243	0.0424	0.0172	0.0273	0.0445	0.0164167	0.0203333	0.03675	0.0063968
NTAN1+mi	0.0162	0.0158	0.032	0.0164	0.0181	0.0345	0.0171	0.0169	0.034	0.0206	0.0329	0.0535	0.0222	0.0338	0.056	0.0219	0.0311	0.053	0.0190667	0.0247667	0.0438333	0.0113959
DCV(15h.p.i)	0.0793	0.1207	0.2	0.0838	0.1205	0.2043	0.0941	0.1352	0.2293	0.0625	0.0877	0.1502	0.0696	0.0969	0.1665	0.0748	0.0927	0.1675	0.07735	0.10895	0.1863	0.0296964
NTAN1+DCV(15h.p.i)	0.0992	0.1445	0.2437	0.1056	0.149	0.2546	0.1077	0.141	0.2487	0.1259	0.1822	0.3081	0.1381	0.1806	0.3187	0.1344	0.1745	0.3089	0.118483	0.161967	0.28045	0.0348248
DCV(18h.p.i)	0.0989	0.1703	0.2692	0.103	0.1631	0.2661	0.0986	0.1611	0.2597	0.0968	0.167	0.2638	0.1081	0.1607	0.2688	0.0957	0.1583	0.254	0.100183	0.163417	0.2636	0.00586617
NTAN1+DCV(18h.p.i)	0.117	0.2585	0.3755	0.1229	0.2473	0.3702	0.1211	0.2394	0.3605	0.1213	0.2598	0.3811	0.1266	0.2506	0.3772	0.1272	0.2379	0.3651	0.122683	0.248917	0.3716	0.00780051
