# Supplementary material for: A picorna-like virus suppresses the N-end rule pathway to inhibit apoptosis
Source: eLife journal article supplement (doi:10.7554/elife.30590), 2017-12-12
Supplement: supp [file for Figure 7C.xls]

## Sheet: Sheet1
	#1	#2	#3	Average	SD
mi	1	1	1	1	0
NTAN1+mi	1.20047	1.32907	1.13198	1.22051	0.100061
DCV(15h.p.i)	5.23296	8.91094	8.13287	7.42559	1.93832
NTAN1+DCV(15h.p.i)	8.24109	8.82753	13.1723	10.0803	2.69375
DCV(18h.p.i)	12.1994	18.8969	17.0046	16.0337	3.45274
NTAN1+DCV(18h.p.i)	19.2743	27.3579	26.9364	24.5228	4.55028
