# Supplementary material for: A picorna-like virus suppresses the N-end rule pathway to inhibit apoptosis
Source: eLife journal article supplement (doi:10.7554/elife.30590), 2017-12-12
Supplement: supp [file for Figure 7D.xls]

## Sheet: Sheet1
DCV/rp49	#1	#2	#3	Average	SD
mi	n.d.	n.d.	n.d.	#DIV/0!	#DIV/0!
NTAN1+mi	n.d.	n.d.	n.d.	#DIV/0!	#DIV/0!
DCV(15h.p.i)	1	1	1	1	0
NTAN1+DCV(15h.p.i)	0.53663	0.59378	0.945402	0.691937	0.221359
DCV(18h.p.i)	3.25803	2.69821	3.23553	3.06392	0.316918
NTAN1+DCV(18h.p.i)	1.86865	1.97931	1.93187	1.92661	0.0555164
